# Supplementary material for: Inferring ethnicity from mitochondrial DNA sequence
Source: PubMed Central journal article supplement (PMC3090759; doi:10.1186/1753-6561-5-s2-s11), 2011-05-28
Supplement: 1753-6561-5-S2-S11-S2.pdf [file 1753-6561-5-S2-S11-S2.pdf]

Additional file 2 — Sample composition of the forensic and published datasets

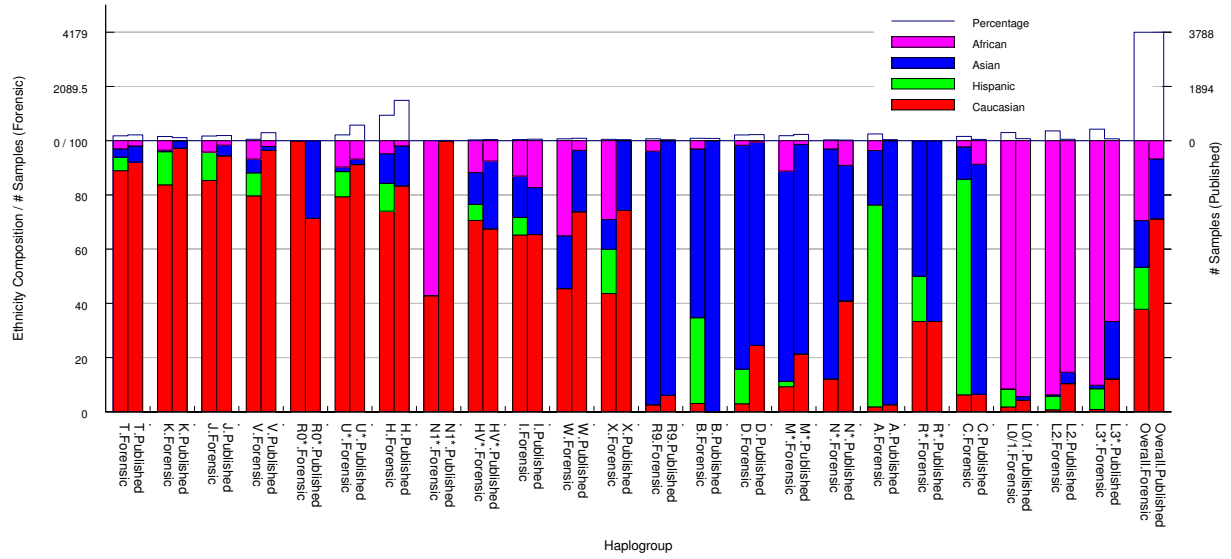

(A)

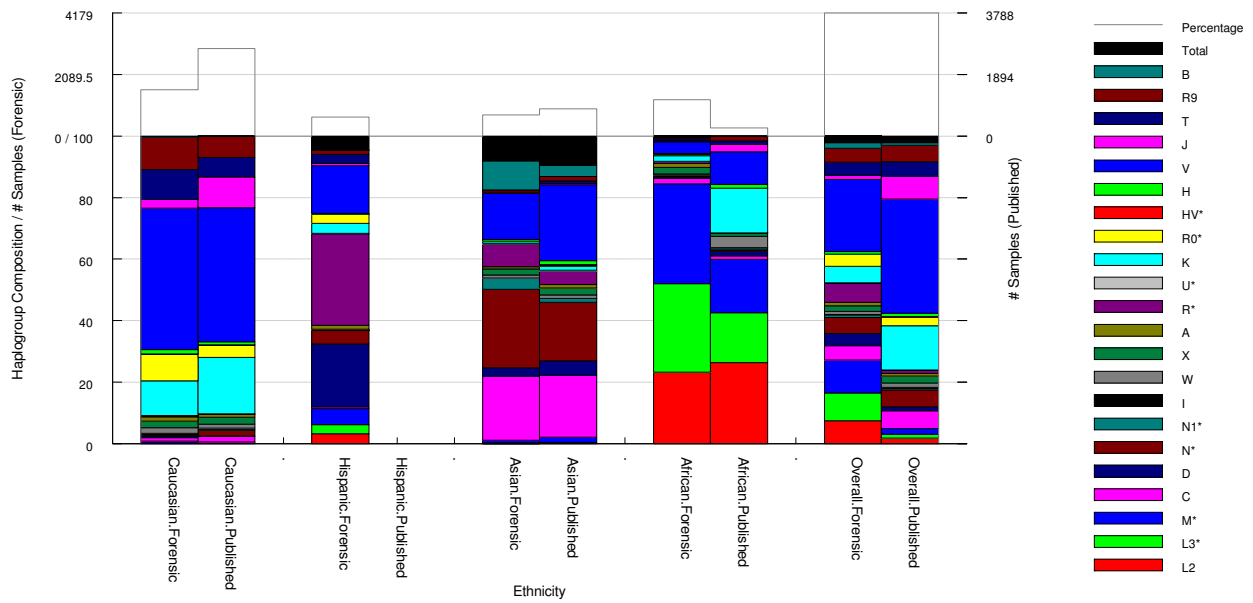

(B)

Ethnicity composition of each haplogroup (A) and haplogroup composition of each ethnic group (B) for the forensic and published datasets.
