# Supplementary material for: Inferring ethnicity from mitochondrial DNA sequence
Source: PubMed Central journal article supplement (PMC3090759; doi:10.1186/1753-6561-5-s2-s11), 2011-05-28
Supplement: 1753-6561-5-S2-S11-S5.pdf [file 1753-6561-5-S2-S11-S5.pdf]

Additional file 5 — Calibration of PCA-SVM posterior probabilities for the FBI published dataset

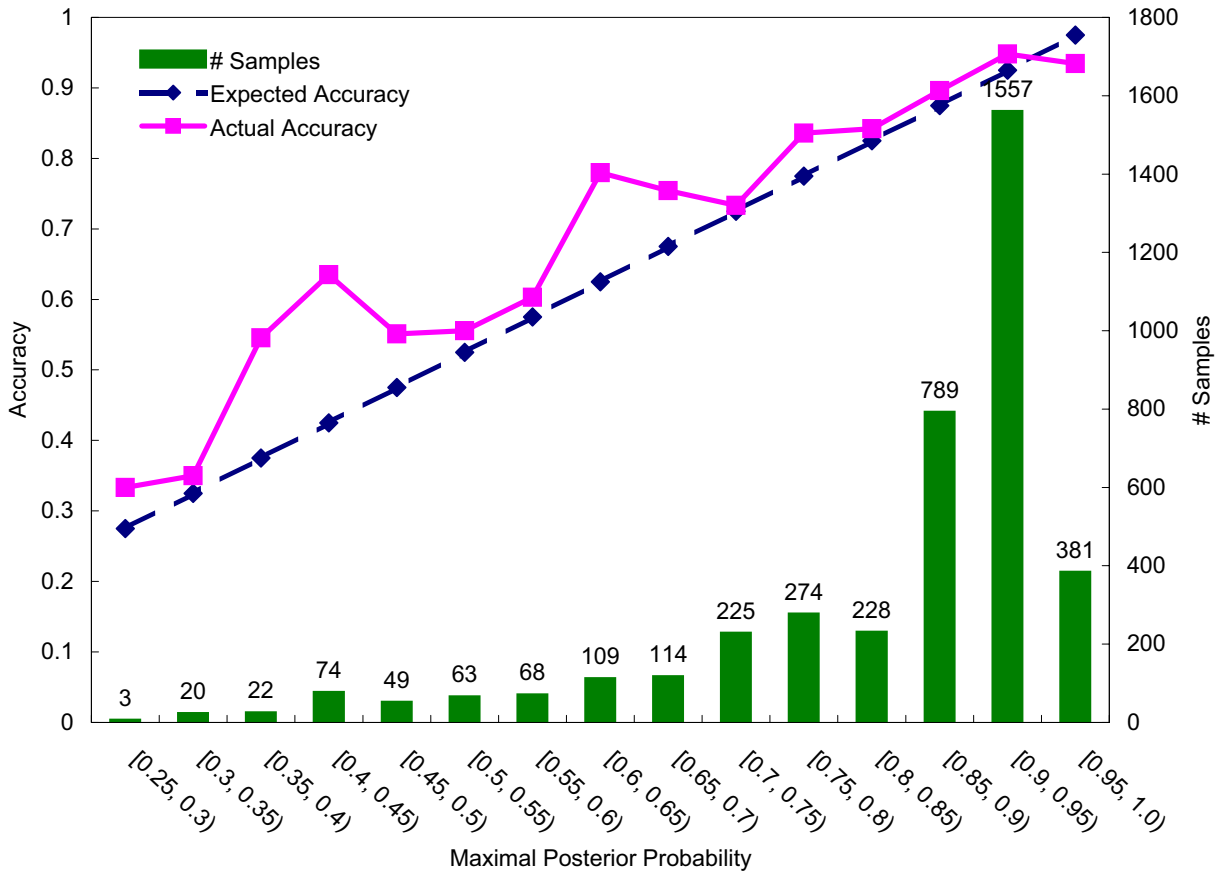

The actual accuracy rates are slightly higher than the estimated posterior probabilities.
